# Supplementary material
Source: publisher figshare collection journal article supplement (https://acs.figshare.com/ndownloader/files/31585478)
Supplement: Supplementary file 1 [file 31585478]

**U-Co Bimetallic-Organic Framework Showing Helical 1D Pore  
Decorated by Abundant -CH<sub>3</sub> Groups: Robust Nature under Acid,  
Base, and Water for High-Performance SO<sub>2</sub> Removal**

Ying Xu, Yaling Fan, Xue Feng Feng, and Feng Luo\*

School of Chemistry, Biology and Materials Science, East China University of Technology,

Nanchang 330013, China, E-mail: [ecitluofeng@163.com](mailto:ecitluofeng@163.com)

## Experimental Methods

**Materials and Physical Measurements.** All chemicals are directly purchased from innoschem with no further purification. The data of X-ray powder diffraction were collected on a Bruker AXSD8 Discover powder diffractometer at 40 kV/40 mA for Cu K $\alpha$  ( $\lambda = 1.5406 \text{ \AA}$ ) at room temperature in the range of 5-50  $^{\circ}(2\theta)$  with a scan speed of 0.1  $^{\circ}$  per step. Thermogravimetric analysis (TG) was performed by a TGA Q500 thermal analysis system. All TGA experiments were performed under a N<sub>2</sub> atmosphere from 40-800 $^{\circ}$ C at a rate of 5 $^{\circ}$ C /min. The gas sorption isotherms were collected on ASAP2020 PLUS (anti-corrosion version). Ultrahigh-purity-grade (>99.999%) N<sub>2</sub>, CO<sub>2</sub>, and SO<sub>2</sub> gases were used in this adsorption measurement. To maintain the experimental temperatures liquid nitrogen (77 K) and temperature-programmed water bath (273 and 298 K) were used respectively.

**Synthesis of ECUT-123.** Co(NO<sub>3</sub>)<sub>2</sub>·6H<sub>2</sub>O (0.1 mmol, 29.1 mg), uranyl nitrate (0.1 mmol, 50 mg) and 2-methyl-2H-imidazole-4,5-dicarboxylic acid (0.1 mmol, 19 mg) were dissolved in a mixture of 1 mL H<sub>2</sub>O and 4 mL N,N'-dimethylformamide in the presence of concentrated nitric acid (0.1 mL). The solution was moved into a 25 mL Teflon-lined stainless steel vessel and heated at 120  $^{\circ}$ C for 3 days. Then it is cooled down to room temperature. Pink crystals were filtered and washed with 10 mL ethanol and 10 mL deionized water. The yield was 81% based on Co(II). Element analysis (%): calc. C/24.88, N/10.27, H/2.67; exp. C/24.56, N/10.19, H/2.74.

**Degassing ECUT-123.** 100 mg MOF crystals were soaked in methanol for 3d and fresh methanol was added every 8 h. After decanting the methanol extract, the sample was dried at room temperature overnight, then further degassed using ASAP2020 PLUS for 24 h at 150 $^{\circ}$ C.

**Chemical and water stability test.** 100 MOF crystals were soaked in corresponding solution such as water or pH=2 or pH=12 solution for one week. Then, the resulted samples were characterized by PXRD and N<sub>2</sub> adsorption. Note that before N<sub>2</sub> adsorption, the activation process should be carried out.

**X-ray Crystallography.** X-ray diffraction data of ECUT-123 was collected at room temperature on a Bruker Apex II CCD diffractometer using graphite monochromated MoK $\alpha$  radiation ( $\lambda=0.71073 \text{ \AA}$ ). The data reduction included a correction for Lorentz and polarization effects, with an applied multi-scan absorption correction (SADABS). The crystal structure was solved and refined using the SHELXTL program suite. Direct methods yielded all non-hydrogen atoms, which were refined with anisotropic thermal parameters. All hydrogen atom positions were calculated geometrically and were riding on their respective atoms. The SQUEEZE subroutine of the PLATON software suite was used to remove the scattering from the highly disordered guest molecules. CCDC 2103848 contains the supplementary crystallographic data of ECUT-123. These data can be obtained free of charge from the Cambridge Crystallographic Data Centre via

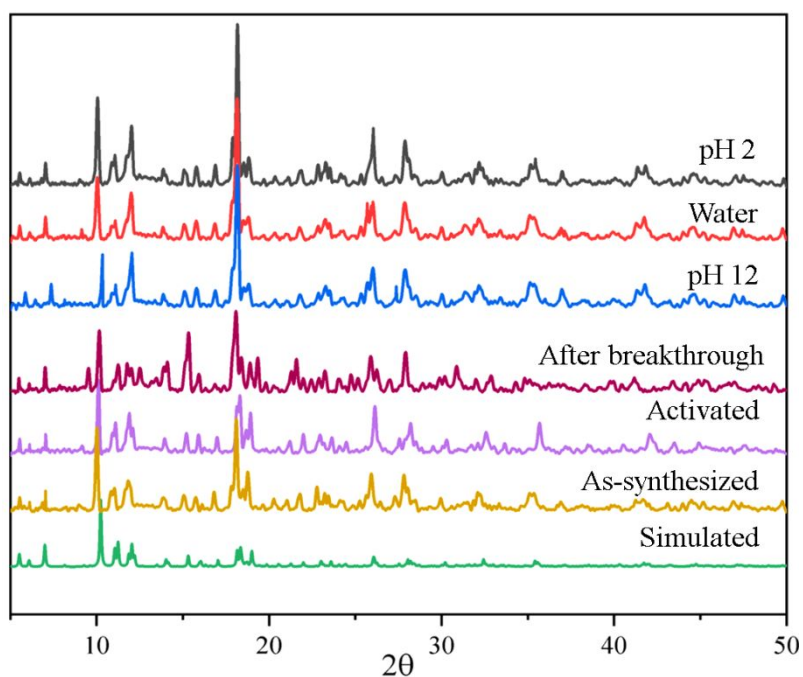

**Figure S1.** A comparison of PXR D results among the simulated data from single crystal data, as-synthesized samples, and the samples under different conditions.

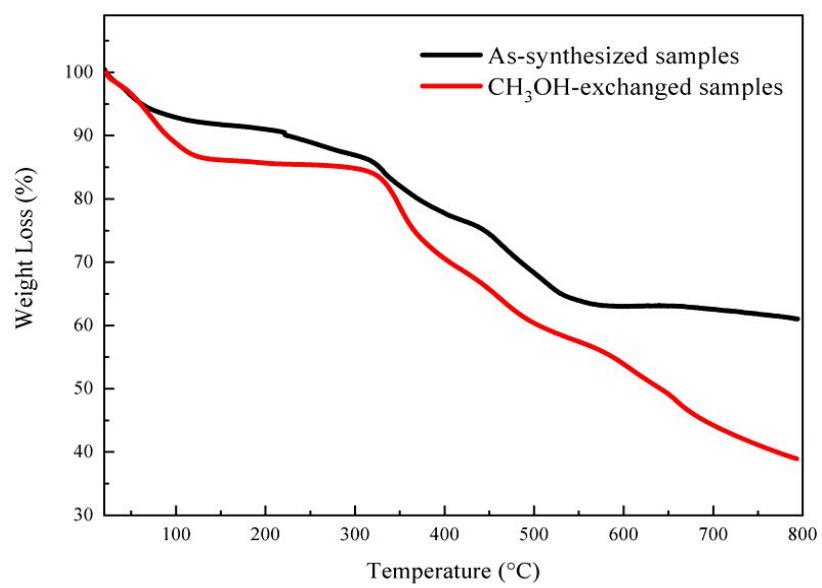

**Figure S2.** The TG plots of the as-synthesized samples and the CH<sub>3</sub>OH-exchanged samples.

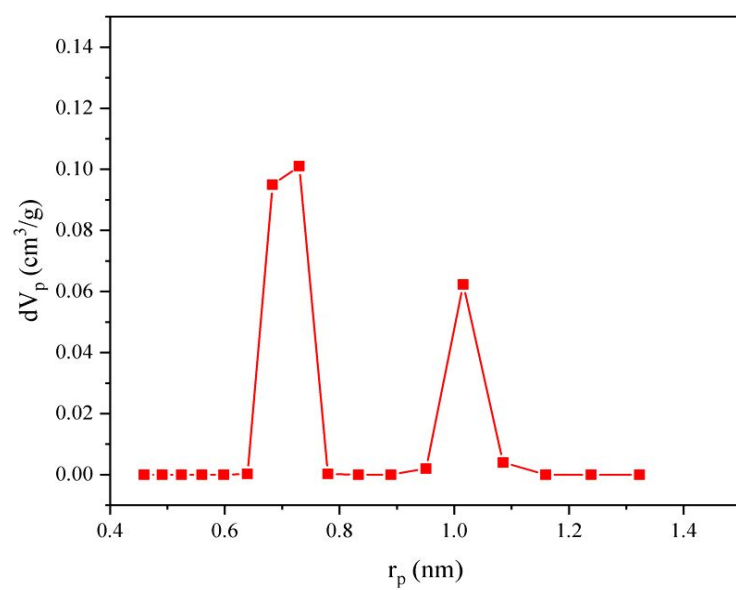

**Figure S3.** The pore size distribution of ECUT-123.

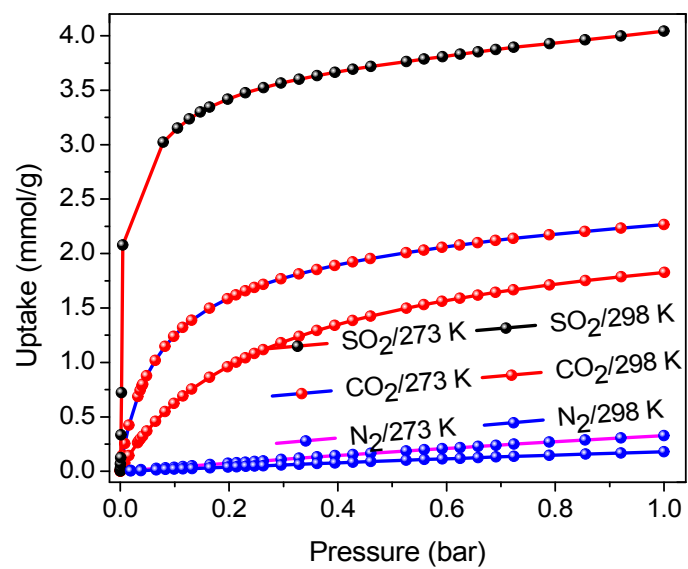

**Figure S4.** The SO<sub>2</sub>, CO<sub>2</sub>, and N<sub>2</sub> adsorption isotherms at 298 K and 273 K.

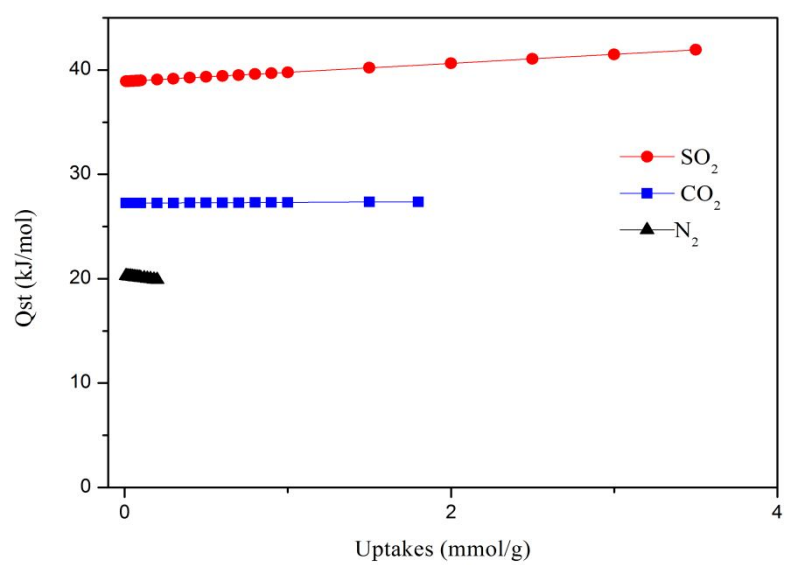

**Figure S5.** The calculated adsorption heat enthalpy of  $SO_2$ ,  $CO_2$  and  $N_2$ .

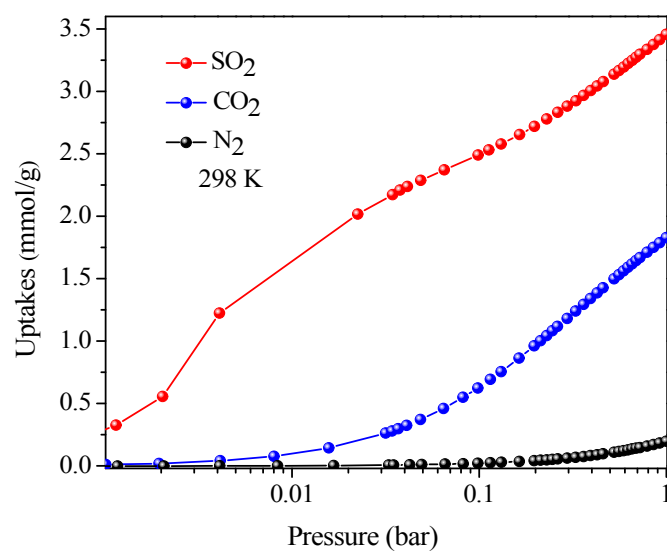

**Figure S6.** The SO<sub>2</sub>, CO<sub>2</sub>, and N<sub>2</sub> adsorption isotherm at low pressure.



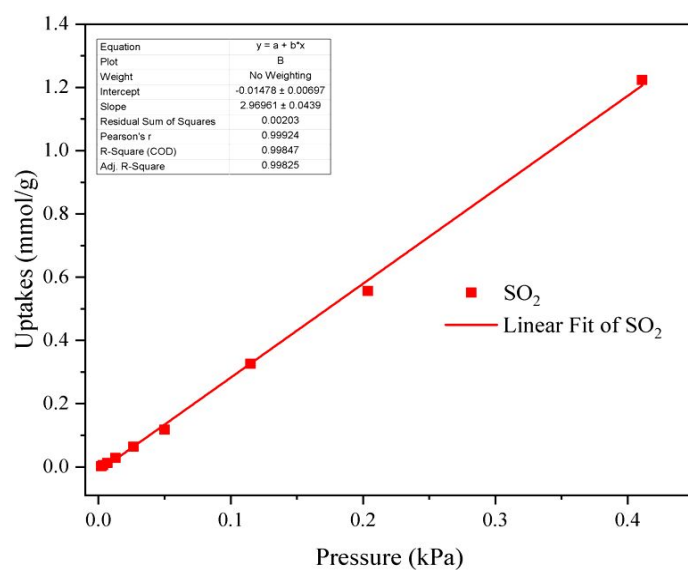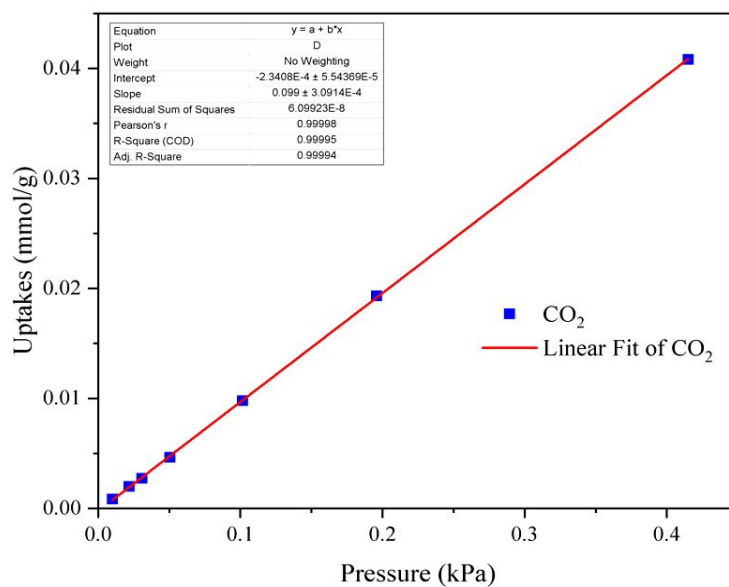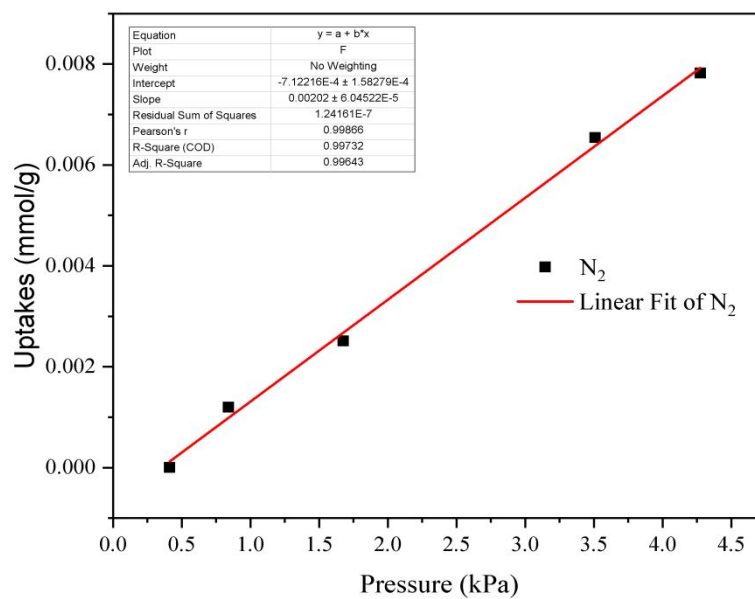

**Figure S7.** The calculation of Henry's constant.

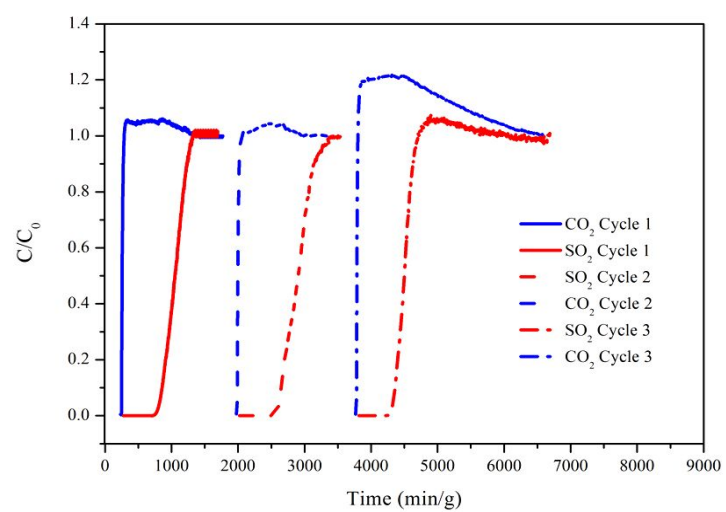

**Figure S8.** The repeating breakthrough tests for ECUT-123.

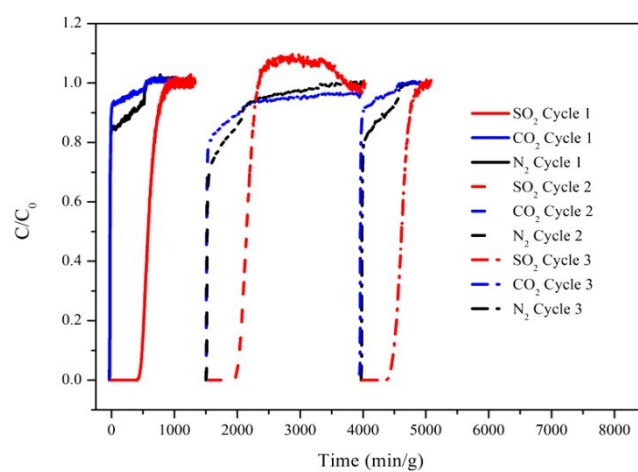

**Figure S9.** The repeating breakthrough tests for ECUT-123.

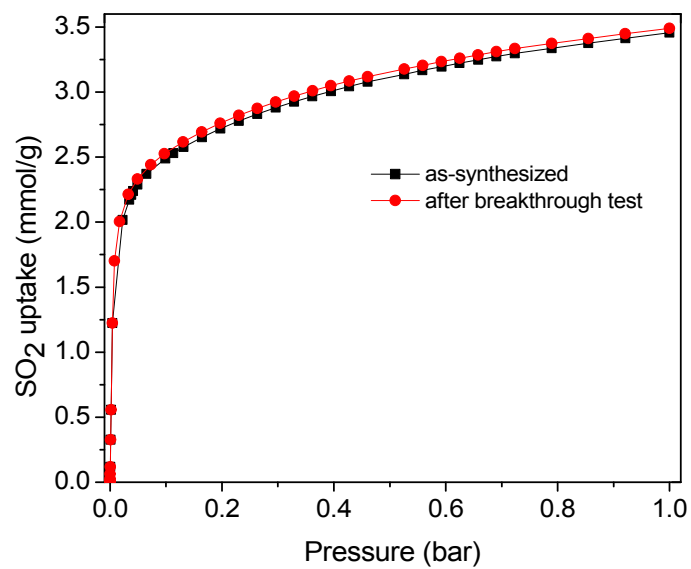

**Figure S10.** A comparison of the SO<sub>2</sub> adsorption for the as-synthesized samples and samples after all breakthrough tests.

**Table S1.** A crystallographic summary of ECUT-123.

|                               |                                                     |
|-------------------------------|-----------------------------------------------------|
| Compound                      | ECUT-123                                            |
| Crystal system                | Tetragonal                                          |
| Space group                   | $P4_32_12$                                          |
| Unit cell dimensions          | a=20.5147(7) Å<br>b=20.5147(7) Å<br>c=25.5520(17) Å |
| Volume                        | 10753.6(9) Å <sup>3</sup>                           |
| Z, Calculated density         | 8, 1.685 mg/m <sup>3</sup>                          |
| F(000)                        | 5020                                                |
| Completeness to theta = 25.00 | 99.9 %                                              |
| R indices (all data)          | R1=0.0954, wR2=0.2358                               |
| Absolute structure parameter  | 0.2(3)                                              |
| CCDC number                   | 2103848                                             |

**Table S2.** A comparison of SO<sub>2</sub> adsorption between reported materials and ECUT-123.

| MOF types                   | SO <sub>2</sub> adsorption capacity<br>(1 bar, 298 K), mmol/g | SO <sub>2</sub> /CO <sub>2</sub><br>selectivity | References |
|-----------------------------|---------------------------------------------------------------|-------------------------------------------------|------------|
| SIFSIX-2-Cu-i               | 11.0                                                          | 87.1                                            | 1          |
| Ni(bdc)(ted) <sub>0.5</sub> | 9.97                                                          | -                                               | 2          |
| MFM-300(In)                 | 8.28                                                          | 50                                              | 3          |
| MFM-202a                    | 10.2                                                          | -                                               | 4          |
| NOTT-300 (Al)               | 7.1                                                           | -                                               | 5          |
| MFM-170                     | 17.5                                                          | 28                                              | 6          |
| MOF-5                       | Less than 0.016                                               | -                                               | 7          |
| IRMOF-3                     | 0.094                                                         | -                                               | 7          |
| MOF-74                      | 3.03                                                          | -                                               | 7          |
| MOF-199                     | 0.5                                                           | -                                               | 7          |
| P(TMGA-co-MBA)              | 4.0                                                           | -                                               | 8          |
| Activated Carbon            | 3.3                                                           | -                                               | 9          |
| Cage-U-Co-MOF               | 3.62                                                          | 80.7                                            | 10         |
| ECUT-111                    | 11.56                                                         | 25.2                                            | 11         |
| ECUT-100                    | 4.95                                                          | 26.9                                            | 12         |
| ECUT-123                    | 3.45                                                          | 32.1                                            | This work  |

“-” denotes the data cannot be obtained from corresponding reference.

1. Cui. X. L.; Yang. Q. W.; Yang. L. F.; Krishna. R.; Zhang. Z. G.; Bao. Z. B.; Wu. H.; Ren. Q.; Zhou. W.; Chen. B. L.; Xing. H. B. Ultrahigh and selective SO<sub>2</sub> uptake in inorganic anion-pillared hybrid porous materials. *Advanced Materials*. **2017**. 29.1606929(1-9).

2. Tan. K.; Canepa. P.; Gong. Q. H.; Liu. J.; Johnson. D. H.; Dyevoich. A.; Thallapally. P. K.; Thonhauser. T.; Li. J.; Chabal. Y. J. Mechanism of preferential adsorption of SO<sub>2</sub> into two microporous paddle wheel frameworks M(bdc)(ted)<sub>0.5</sub>. *Chemistry of Materials*. **2013**. 25.

4653-4662.

3. Savage. M.; Cheng .Y. Q.; Easun. T. L.; Eyley. J. E.; Argent.S. P.; Warren. M. R.; Lewis. W.; Murray. C.; Tang. C. C.; Frogley. M. D.; Cinque G.; Sun. J. L.; Rudic´. S.; Murden R. T.; Benham. M. J.; Fitch. A. N.; Blake. A. J.; Ramirez-Cuesta. A. J.; Yang. S. H.; Schroder. M. Selective Adsorption of Sulfur Dioxide in a Robust Metal–Organic Framework Material. *Advanced Materials*. **2016**. 28. 8705-8711.
4. Yang. S. H.; Liu. L. F.; Sun. J. L.; Thomas. K. M.; Davies A. J.; George. M. W.; Blake. A. J.; Hill. A. H.; Fitch. A. N.; Tang. C. C. , Chroeder. M. Irreversible network transformation in a dynamic porous host catalyzed by sulfur dioxide. *Journal of the American Chemical Society*. **2013**. 135. 4954-4957.
5. Yang. S. H.; Sun. J. L.; Ramirez-Cuesta. A. J.; Callear. S. K.; David. W. F.; Anderson. D. P.; Newby. R.; Blake. A. J.; Parker. J. E.; Tang. C. C.; Schro¨der1. M. Selectivity and direct visualization of carbon dioxide and sulfur dioxide in a decorated porous host. *Nature chemistry*. **2012**. 4.887-894.
6. Smith. G. L.; Eyley. J. E.; Han. X.; Zhang. X. R.; Li. J. N.; Jacques. N. M.; Godfrey. H. G. W.; Argent. S. P.; McPherson. L. J. M.; Teat. S. J.; Cheng Y. Q.; Frogley. M. D.; Cinque. G.; Day S. J.; C. C. Tang.; Easun . T. L.; Rudić. S.; Ramirez-Cuesta . A. J.; Yang. S.H.; Schro¨der1. M. Reversible coordinative binding and separation of sulfur dioxide in a robust metal–organic framework with open copper sites. *Nature Materials*. **2019**. 18. 1358-1365.
7. Britt. D.; Tranchemontagne. D.; Yaghi O. M. Metal-organic frameworks with high capacity and selectivity for harmful gases. *Proceedings of the National Academy of Sciences of the United States of America*. **2008**. 105. 11623-11627.
8. Wu. L. B.; An. D.; Dong. J.; Zhang. Z. M.; Li. B. G.; Zhu. S. P. Preparation and SO<sub>2</sub> Absorption/Desorption Properties of Crosslinked Poly(1,1,3,3-Tetramethylguanidine Acrylate) Porous Particles. *Macromolecular Rapid Communications*. **2006**. 37.1949-1954.
9. Yi. H. H.; Wang. Z. X.; Liu. H.Y.; Tang X. L.; Ma. D.; Zhao. S. Z.; Zhang. B. W.; Gao. F. Y.; Zuo Y. R. Adsorption of SO<sub>2</sub>, NO, and CO<sub>2</sub> on Activated Carbons: Equilibrium and Thermodynamics . *Journal of Chemical & Engineering Data*. **2014**. 59. 1556-1563.
10. Fan, Y. L.; Yin, M. J.; Krishna, R.; Feng, X. F.; Luo, F. Constructing a robust gigantic drum-like hydrophobic [Co<sub>24</sub>U<sub>6</sub>] nanocage in a metal–organic framework for high-performance SO<sub>2</sub> removal in humid conditions. *J. Mater. Chem. A* **2021**, 9, 4075–4081.
11. Yin, M. J.; Xiong, X. H.; Feng, X. F.; Xu, W. Y.; Krishna, R.; Luo, F. A Robust Cage-Based Metal–Organic Framework Showing Ultrahigh SO<sub>2</sub> Uptake for Efficient Removal of Trace SO<sub>2</sub> from

SO<sub>2</sub>/CO<sub>2</sub> and SO<sub>2</sub>/CO<sub>2</sub>/N<sub>2</sub> Mixtures. *Inorg. Chem.* **2021**, *60*, 3447–3451.

12. Guo, L. J.; Feng, X. F.; Gao, Z.; Krishna, R.; Luo, F. Robust 4d–5f Bimetal–Organic Framework for Efficient Removal of Trace SO<sub>2</sub> from SO<sub>2</sub>/CO<sub>2</sub> and SO<sub>2</sub>/CO<sub>2</sub>/N<sub>2</sub> Mixtures. *Inorg. Chem.* **2021**, *60*, 1310–1314.
